# Supplementary material for: Observational and Simulation Evidence for a Mid-latitude Ring Current Wedge during Substorms
Source: Research Square preprint supplement (doi:10.21203/rs.3.rs-6868147/v1), 2025-07-08
Supplement: Supplementary file 1 [file f3785f17f81617a621a91209.pdf]

# Supplementary Information for

## Observational and Simulation Evidence for a Mid-latitude Ring Current Wedge during Substorms

Xiyu Liu<sup>1,2</sup>, Yiqun Yu<sup>1,2\*</sup>, Jiaojiao Zhang<sup>3\*</sup>, Longxing Ma<sup>1,2</sup>, Depeng An<sup>1,2</sup>, Tao Yan<sup>4</sup>, Longhui Liu<sup>1,2</sup>, Jinbin  
Cao<sup>1,2</sup>, Chi Wang<sup>3</sup>

<sup>1</sup> School of Space and Earth Sciences, Beihang University, Beijing, China

<sup>2</sup> Key Laboratory of Space Environment Monitoring and Information Processing, Ministry of Industry and  
Information Technology, Beihang University, Beijing, China

<sup>3</sup> State Key Laboratory of Space Weather, National Space Science Center, Chinese Academy of Sciences,  
Beijing, China

<sup>4</sup> Planetary Environmental and Astrobiological Research Laboratory (PEARL), School of Atmospheric  
Sciences, Sun Yat-sen University, Zhuhai, People's Republic of China

Corresponding authors: yiqunyul7@gmail.com, jjzhang@spaceweather.ac.cn

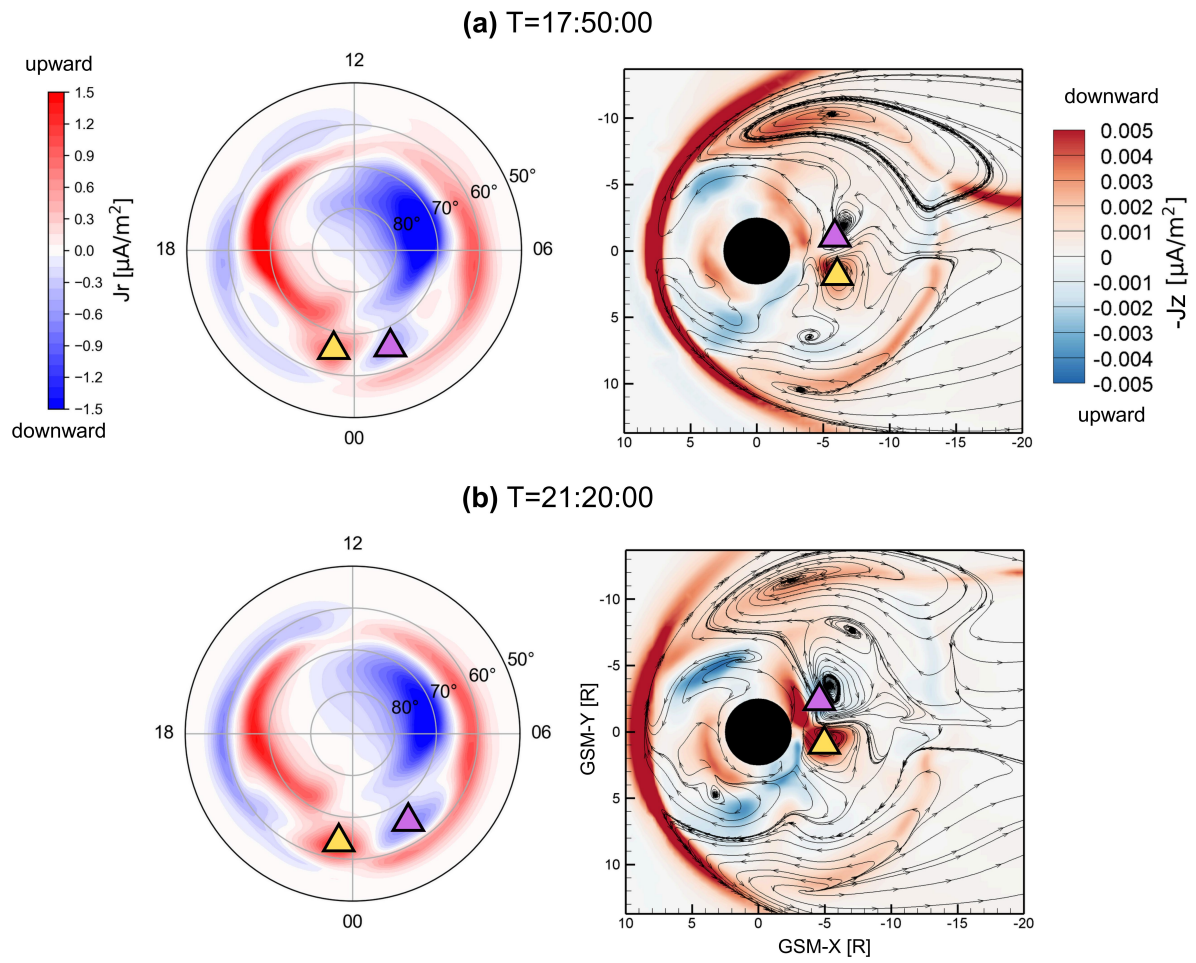

20  
 21 Fig. S1. FACs in the ionosphere and magnetosphere equatorial plane at (a) 17:50 UT and (b) 21:20 UT in  
 22 the same format as Fig. 4. The RCW-associated FACs are located around 60°-70° MLAT, denoted by the  
 23 triangles.  
 24

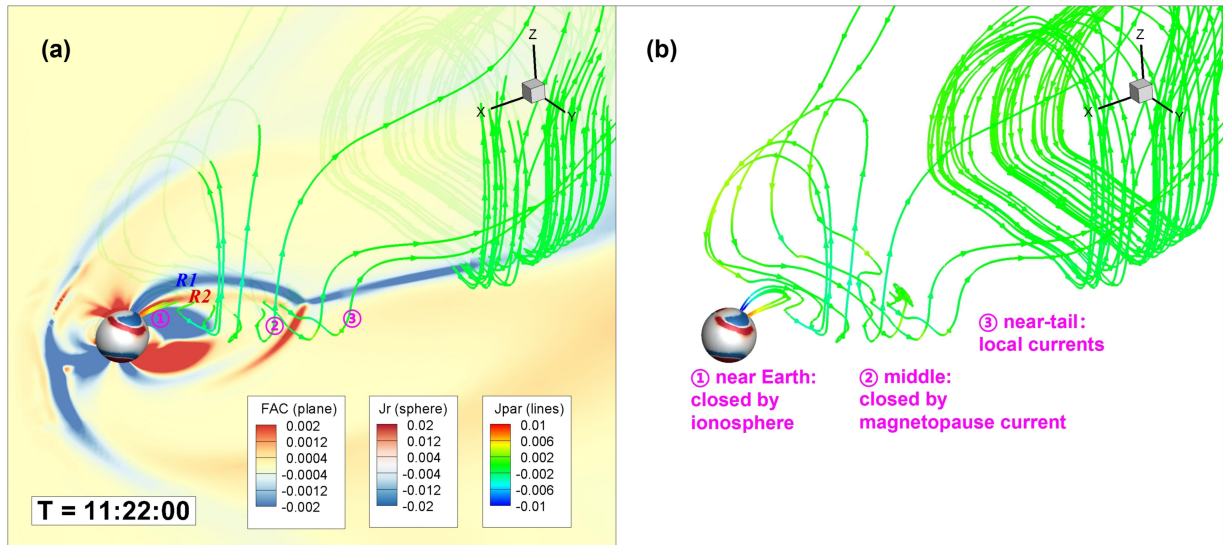

Fig. S2. Three-dimensional illustrations of current loops (curves) in the magnetosphere at 11:22 UT. The background plane in (a) shows 23 MLT meridian slice with FACs contours in the GSM coordinate. The contours on the sphere and lines are in the same format as Fig. 5.
